# Supplementary material for: Turning things around: from cationic/anionic complexation-induced nanoemulsion instability to toughened water-resistant waterborne polyurethanes
Source: Royal Society of Chemistry journal article supplement (doi:10.1039/d2ta05611a), 2022-01-01
Supplement: d2ta05611a4.pdf [file d2ta05611a4.pdf]

## Supporting Information

### **Turn things around: from cationic/anionic complexation-induced nanoemulsion instability to toughen water resistant waterborne polyurethanes**

*Yuan Yao, Meng Xiao, and Wenguang Liu\**

Y. Yao, Prof. W. Liu.  
School of Materials Science and Engineering  
Tianjin Key Laboratory of Composite and Functional Materials  
Tianjin University  
Tianjin 300350, China  
E-mail: [wgliu@tju.edu.cn](mailto:wgliu@tju.edu.cn)

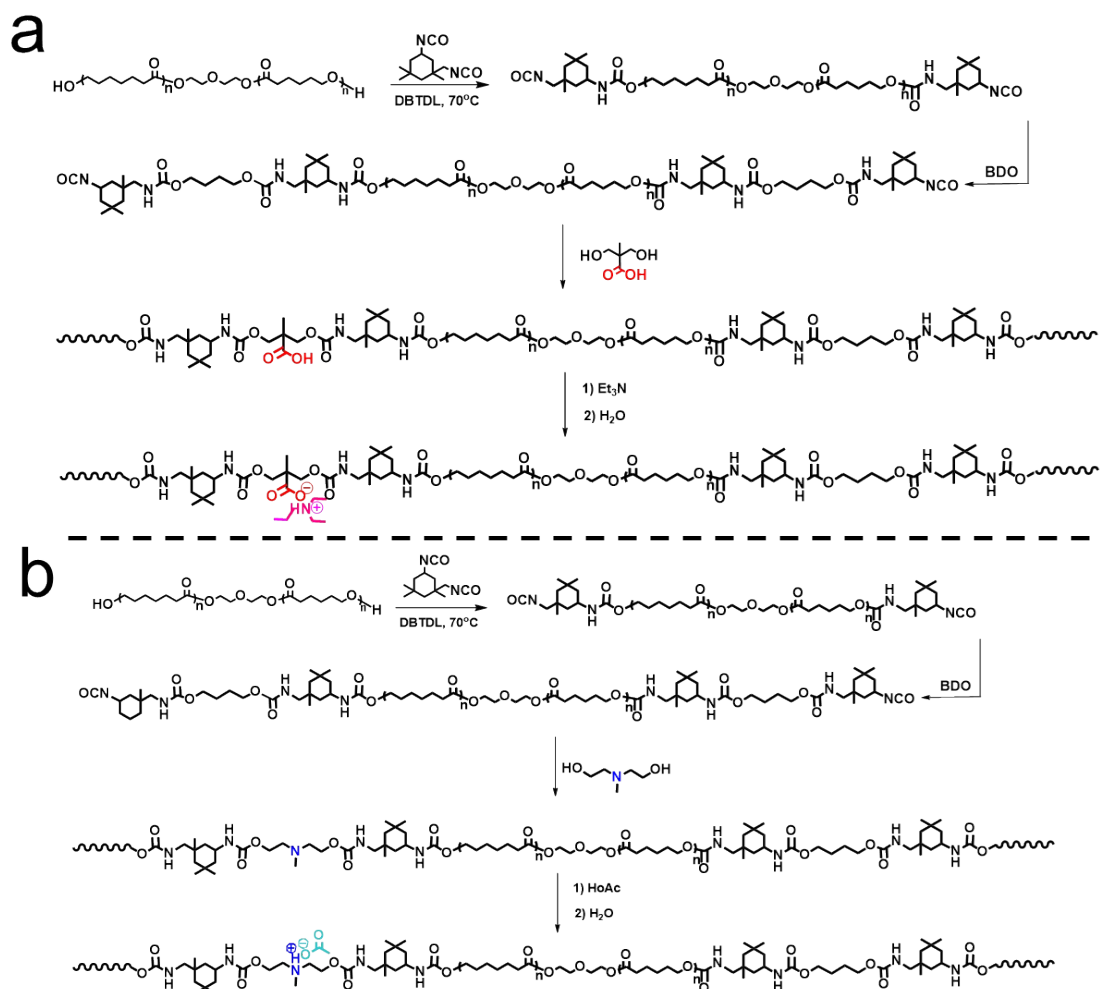

**Figure S1.** Synthesis and chemical structures of supramolecular (a) WPU- and (b) WPU+ elastomer.

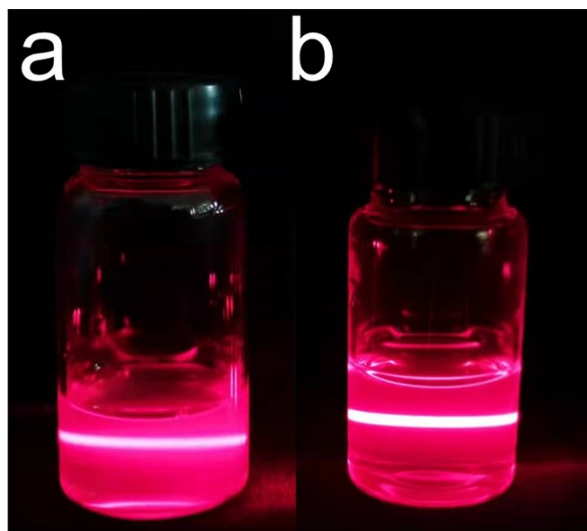

**Figure S2.** Tyndall effect of laser beam scattering with a) WPU+ and b) WPU- dispersions, showing colloidal particle formation in water.

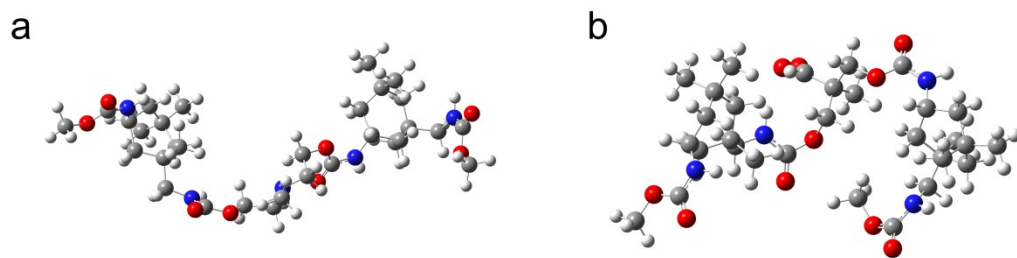

**Figure S3.** Conformation of hydrophilic hard segments in model system: (a) WPU+; (b) WPU-.

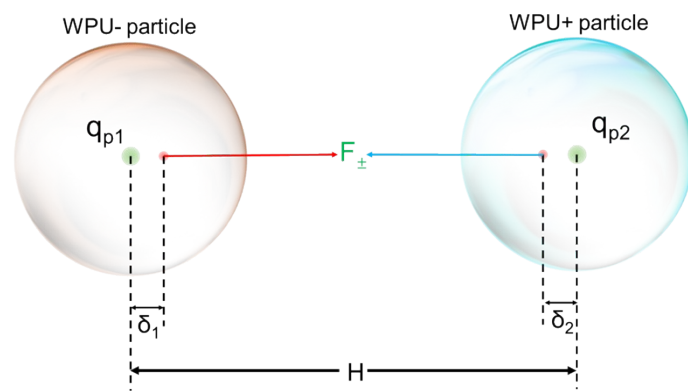

**Figure S4.** Model of electrostatic attraction of oppositely charged particles.

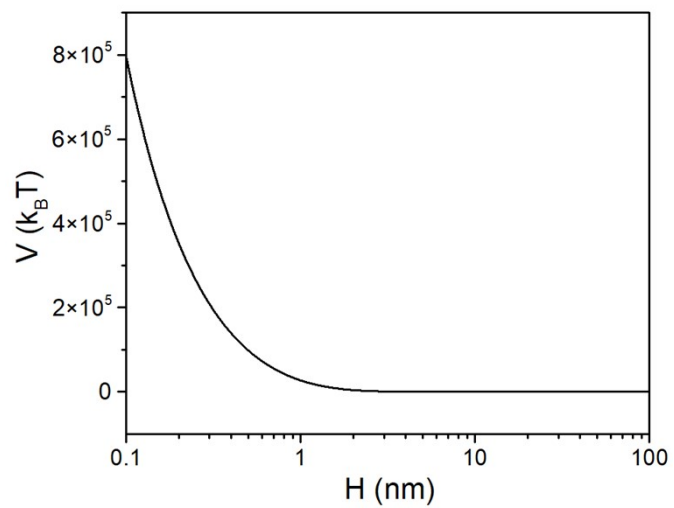

**Figure S5.** Plot of the electrostatic attraction potential energy for two oppositely charged particles separated by a distance  $H$ .

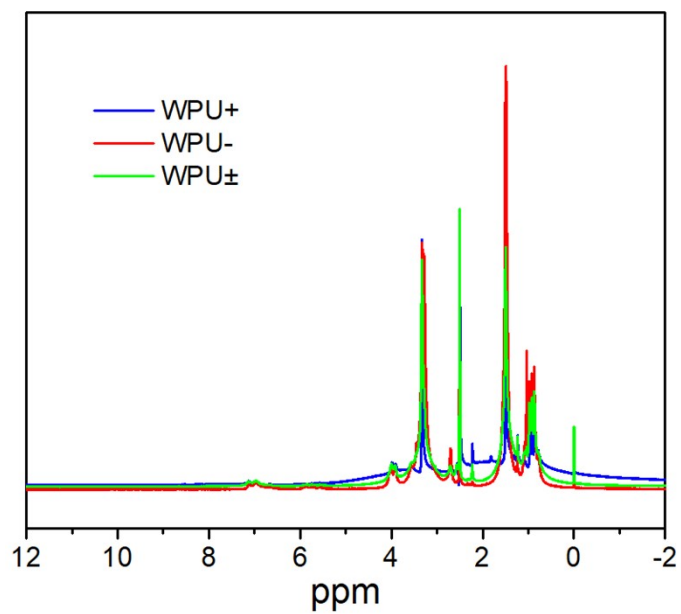

**Figure S6.** <sup>1</sup>H NMR spectra of WPU polymers in DMSO-d<sub>6</sub>. The spectrum indicated that there were typical characteristic peaks of the carbamate (7.00 ppm attributed to -NH-), and PCL diol (2.23, 1.50, and 4.00 ppm attributed to methylene).

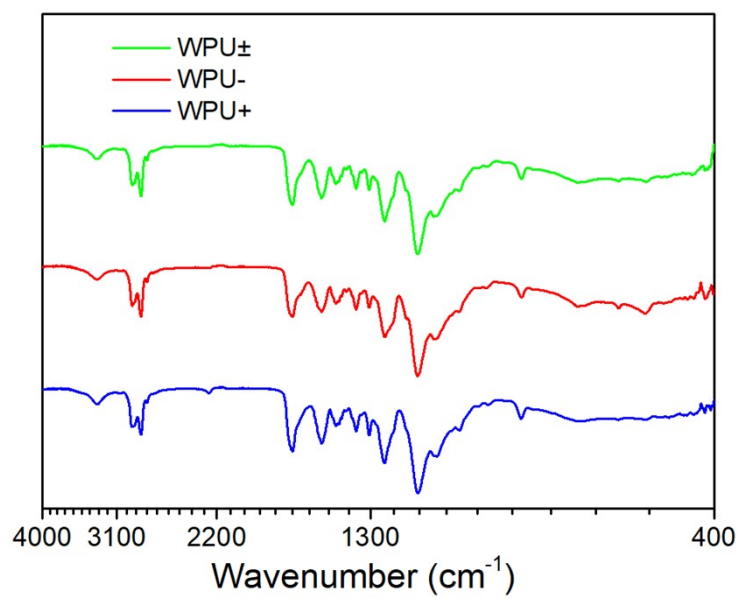

**Figure S7.** FTIR spectra of WPU films.



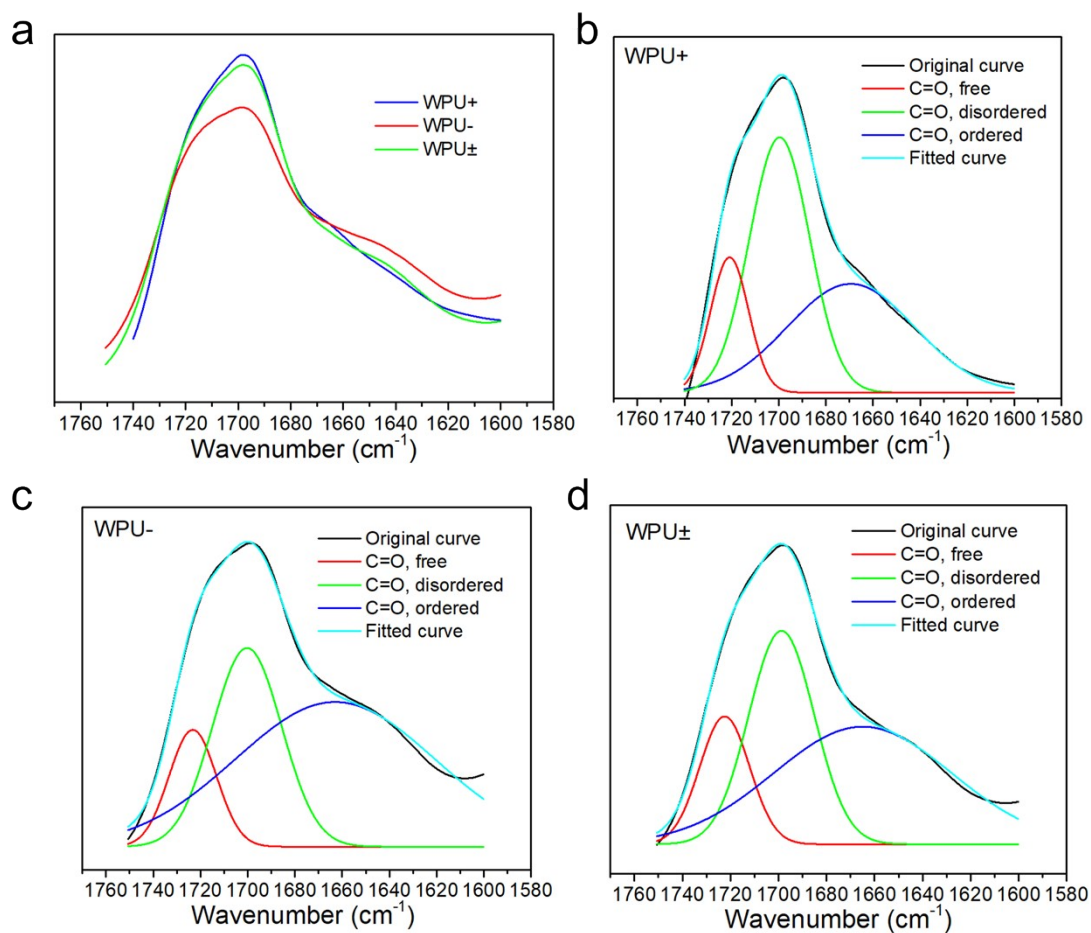

**Figure S8.** a) FTIR Spectra of WPU in the range from 1600 to 1750  $\text{cm}^{-1}$ . Splits of stretching vibration C=O bands in the FTIR spectra of b) WPU+, c) WPU- and d) WPU± via peak deconvolution method.

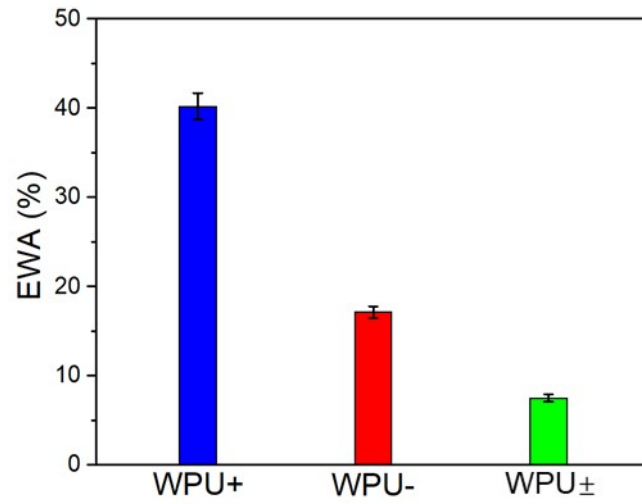

**Figure S9.** Equilibrium water absorptions of WPUs. (n=3)

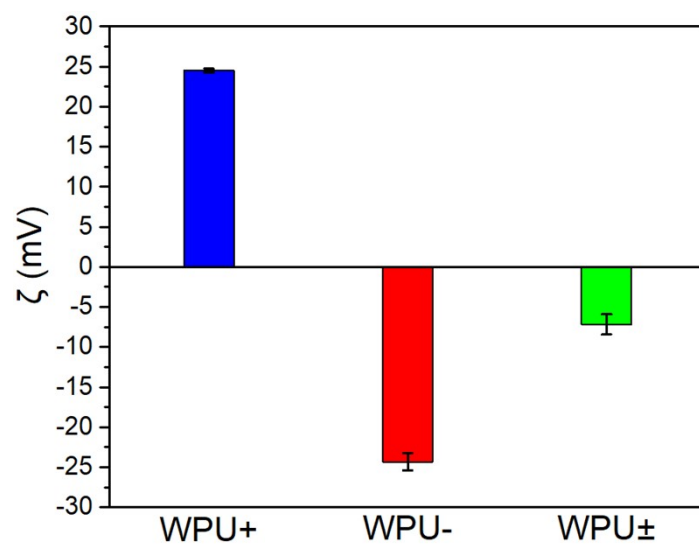

**Figure S10.** Surface zeta potentials of WPUs. (n=3)

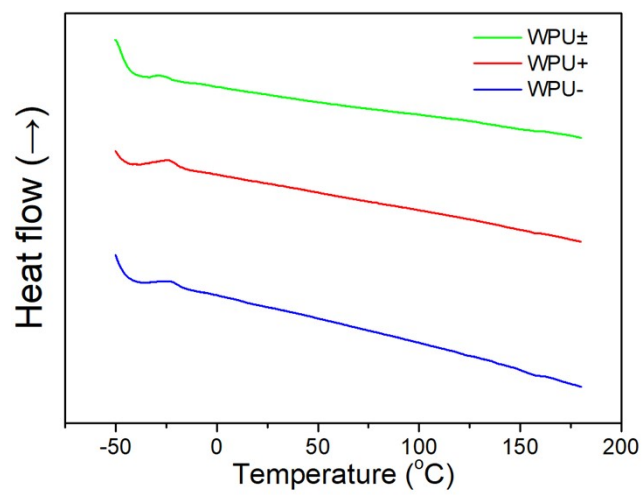

**Figure S11.** DSC curves of WPUs.

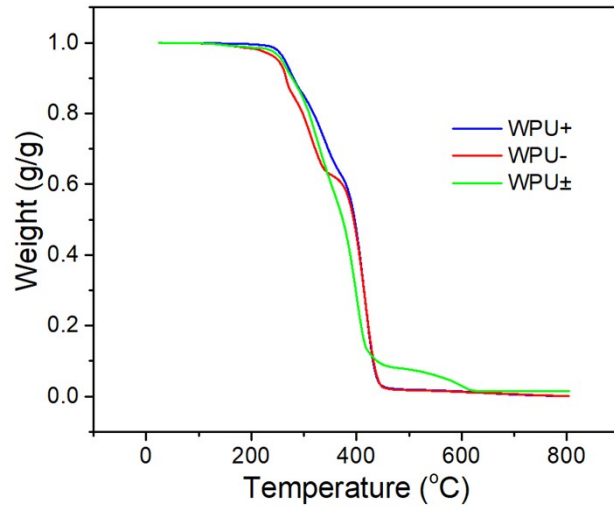

**Figure S12.** TGA curves of WPUs.

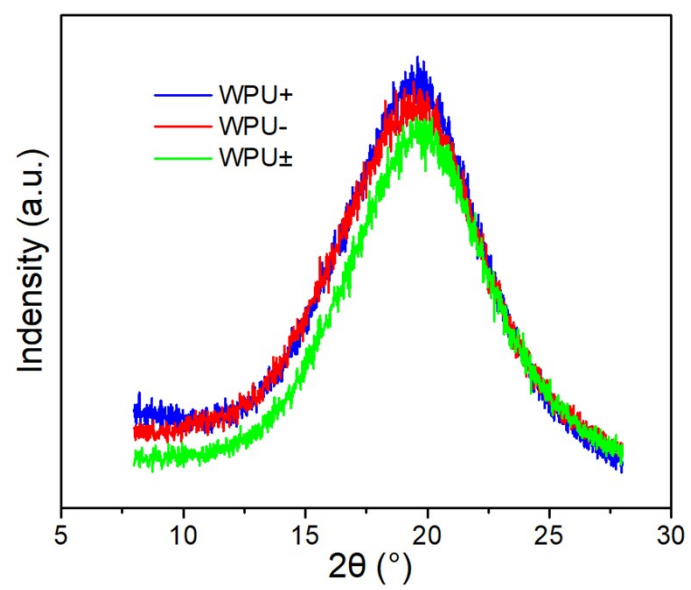

**Figure S13.** XRD patterns of WPUs.

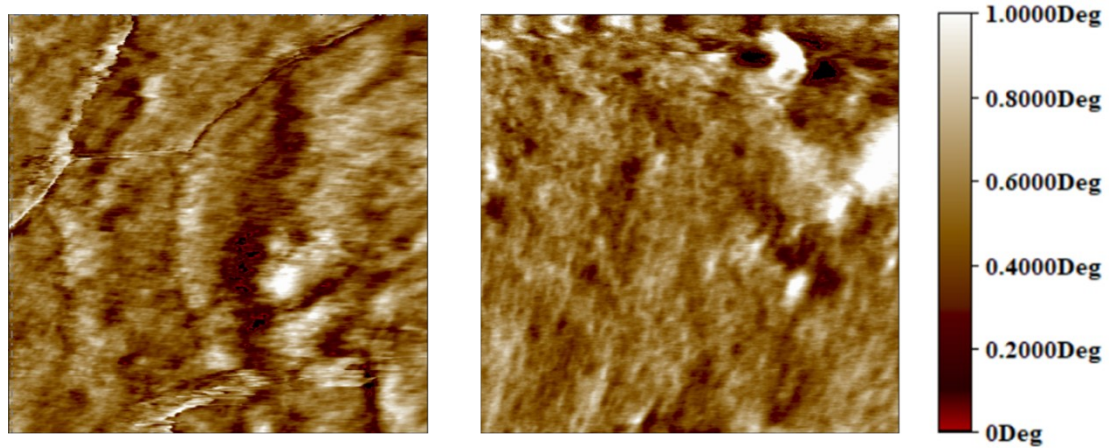

**Figure S14.** AFM images of WPU+ film (left) and WPU- film (right). Size 1  $\mu\text{m}$  $\times$ 1  $\mu\text{m}$ .

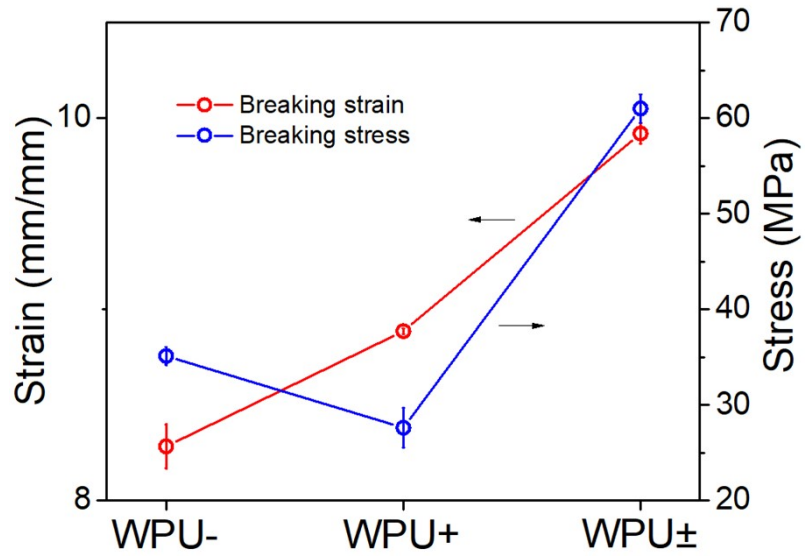

**Figure S15.** Breaking strain and tensile strength of WPUs.



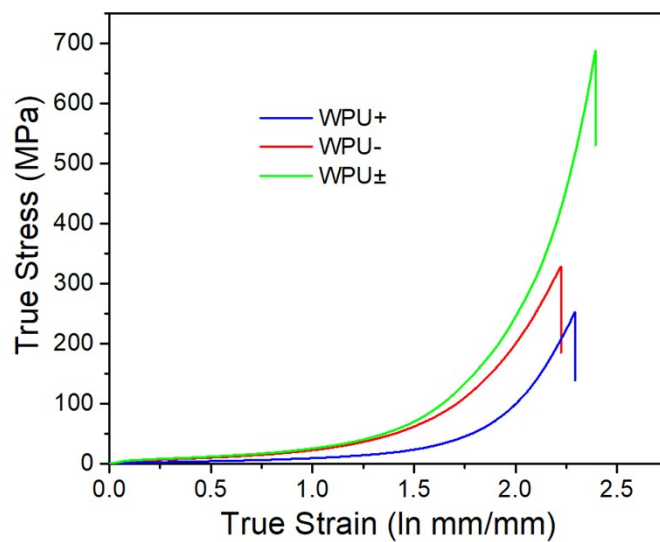

**Figure S16.** True stress–strain curves of WPUs.

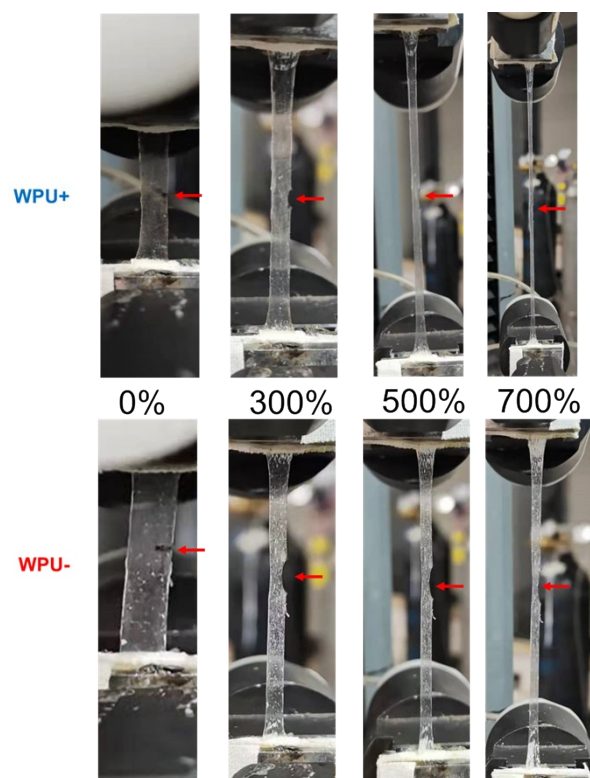

**Figure S17.** Images of the notched WPU+ and WPU- samples during stretching.

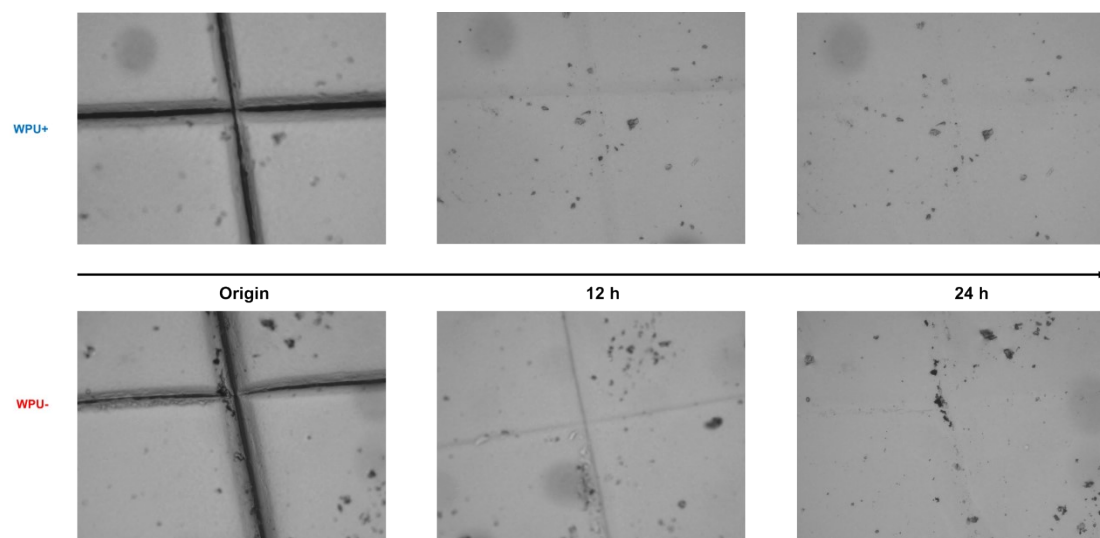

**Figure S18.** Optical microscope images of artificially scratched WPU+ and WPU- films in the healing process.

a

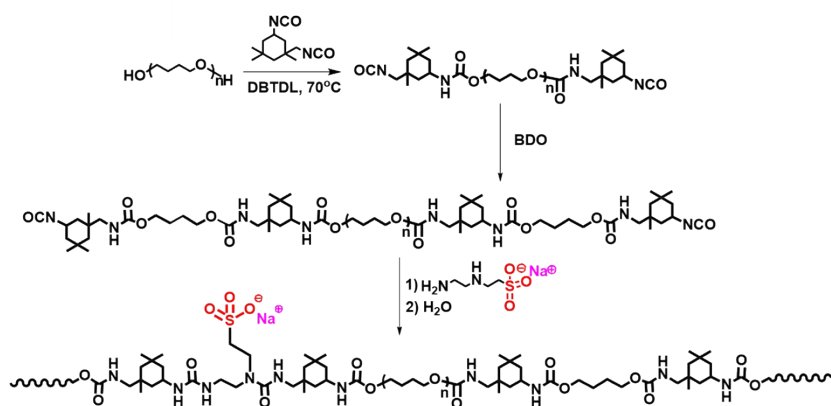

b

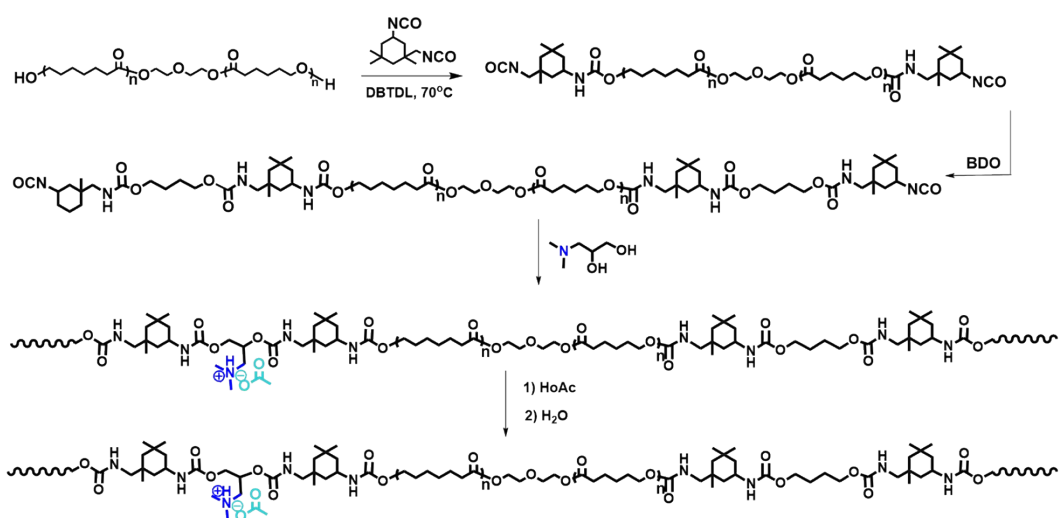

**Figure S19.** Synthesis and chemical structures of supramolecular (a) WPU<sub>2</sub><sup>-</sup> and (b) WPU<sub>2</sub><sup>+</sup> elastomer.

a

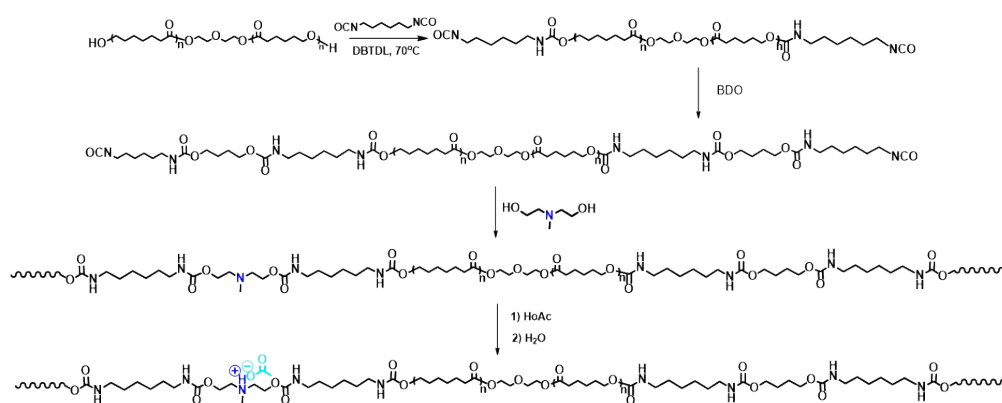

b

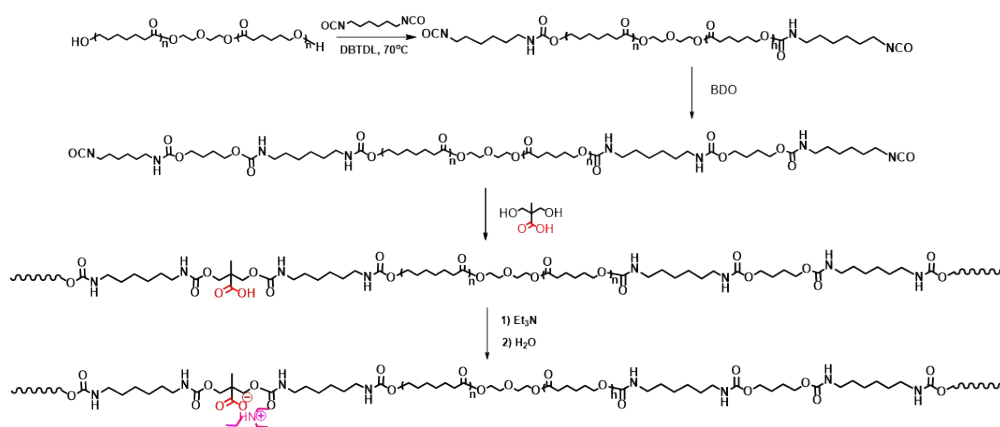

**Figure S20.** Synthesis and chemical structures of supramolecular (a) WPU<sub>3</sub><sup>+</sup> and (b) WPU<sub>3</sub><sup>-</sup> elastomer.

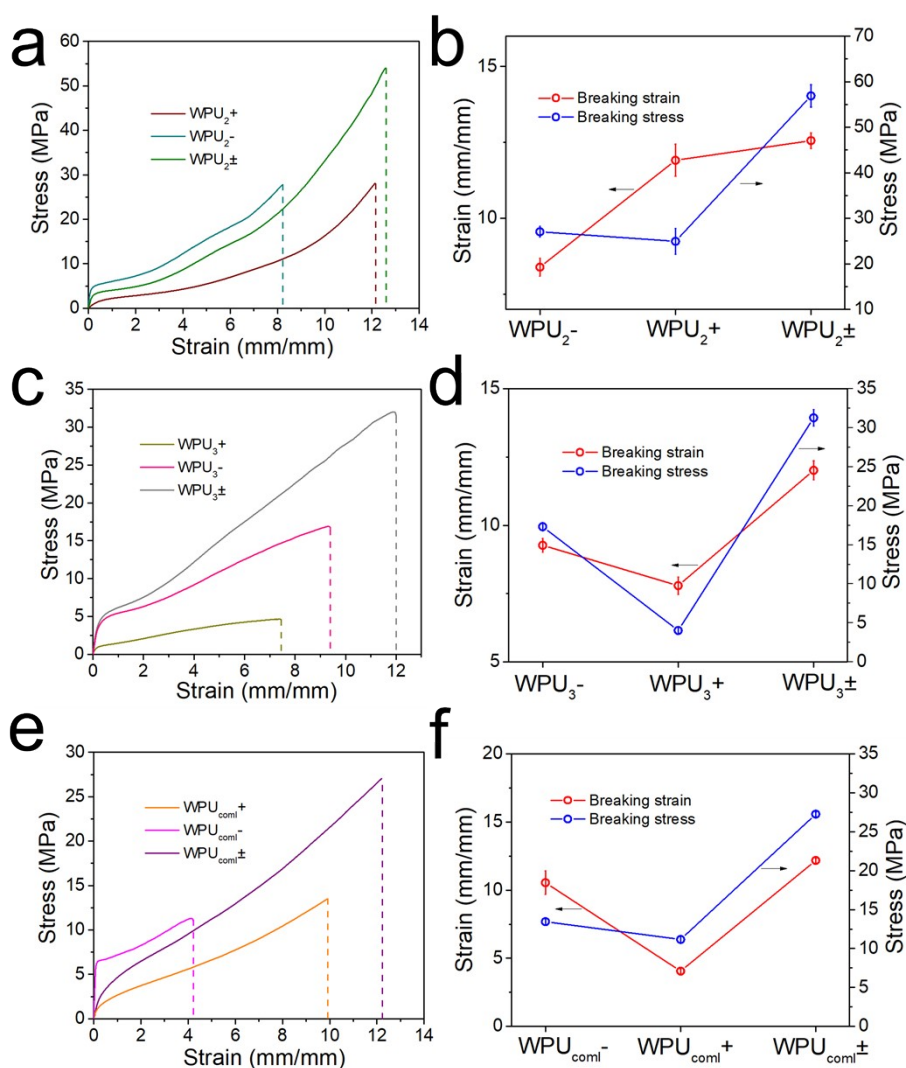

**Figure S21.** a) Stress–strain curves of WPU<sub>2</sub> elastomers. (n=3) b) Breaking strain and tensile strength of WPU<sub>2</sub> elastomers. c) Stress–strain curves of WPU<sub>3</sub> elastomers. (n=3) d) Breaking strain and tensile strength of WPU<sub>3</sub> elastomers. e) Stress–strain curves of WPU<sub>comI</sub> elastomers. (n=3) f) Breaking strain and tensile strength of WPU<sub>comI</sub> elastomers.

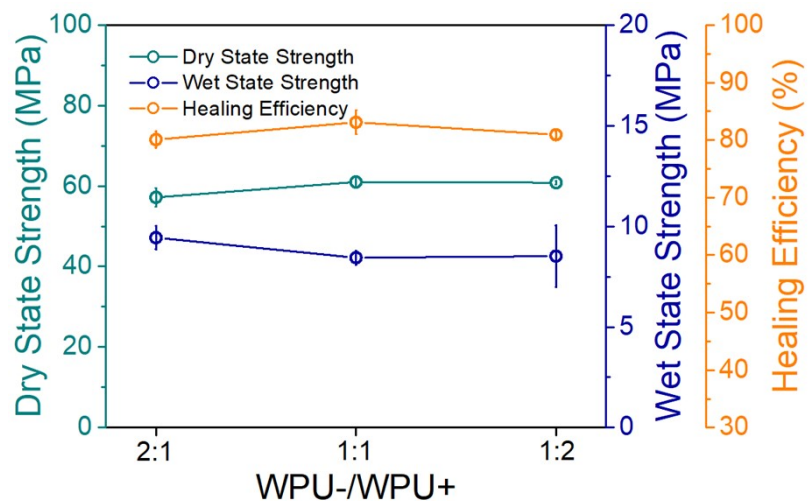

**Figure S22.** Dependences of the tensile strength, water resistance and healing efficiency of WPU± films on the ratio of WPU+ and WPU-.

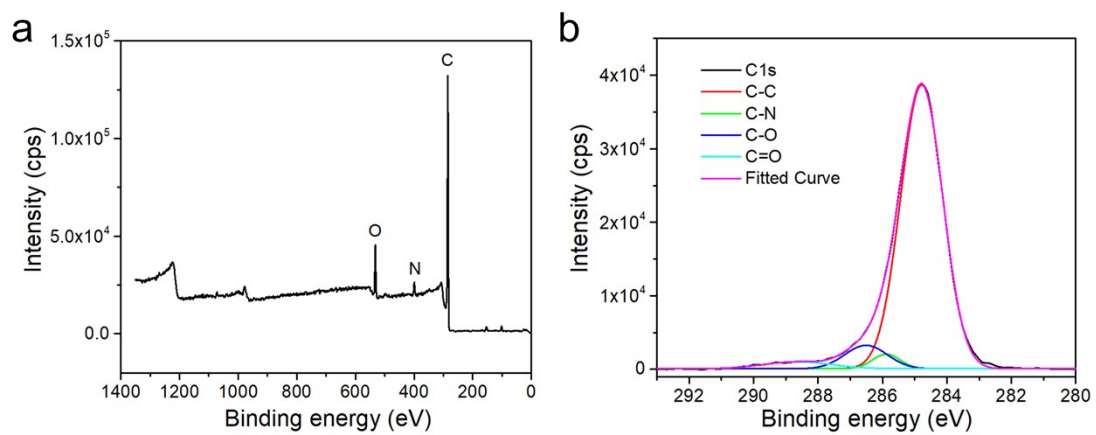

**Figure S23.** XPS spectra of the complexed WPU± : (a) survey scan spectra, (b) C1s spectra.



**Table S1.** Recipes used in the synthesis of the PU samples.

| Sample             | Polyol      | Hydrophilic chain extender | BDO    | Diisocyanate | Hard segment content |
|--------------------|-------------|----------------------------|--------|--------------|----------------------|
| WPU+               | 4.00 g PCL  | 0.48g MDEA                 | 0.09 g | 2.40 g IPDI  | 42.6%                |
| WPU-               | 4.00 g PCL  | 0.54g DMPA                 | 0.09 g | 2.40 g IPDI  | 43.1%                |
| WPU <sub>2</sub> + | 4.00 g PCL  | 0.48g DMAPD                | 0.09 g | 2.40 g IPDI  | 42.6%                |
| WPU <sub>2</sub> - | 4.00 g PTMG | 0.38 g AAS                 | 0.09 g | 1.87 g IPDI  | 36.9%                |
| WPU <sub>3</sub> + | 4.00 g PCL  | 0.48g MDEA                 | 0.09 g | 1.61 g HDI   | 35.3%                |
| WPU <sub>3</sub> - | 4.00 g PCL  | 0.54g DMPA                 | 0.09 g | 1.61 g HDI   | 35.9%                |

**Table S2.** The interaction energies among WPU+, WPU-, and water molecules.

| Model       | Interaction energy (kcal mol <sup>-1</sup> ) |
|-------------|----------------------------------------------|
| Water/Water | -4.5                                         |
| Water/WPU+  | -17.2                                        |
| Water/WPU-  | -12.5                                        |
| WPU+/WPU+   | -28.8                                        |
| WPU-/WPU-   | -33.7                                        |
| WPU+/WPU-   | -42.7                                        |

## **Supporting Movies**

**Movie S1.** WPU± can be extruded directly as a hot melt adhesive, and the adhesive adheres firmly to the glass sheet even after withstanding violent water rinsing.

**Movie S2.** WPU± adhered aluminum sheet can lift 15 kg after immersing 30 days in water.

**Movie S3.** WPU+ adhered aluminum sheet cannot carry 15 kg after immersing 30 days in water.
